# Supplementary material for: Interactions of carbon nanotubes with the nitromethane–water mixture governing selective adsorption of energetic molecules from aqueous solution
Source: Royal Society of Chemistry journal article supplement (doi:10.1039/c4cp05909c), 2015-01-01
Supplement: c4cp05909c1.pdf [file c4cp05909c1.pdf]

# Interactions of Carbon Nanotubes with Nitromethane- Water Mixture Governing Selective Adsorption of Energetic Molecules from Aqueous Solution

Yingzhe Liu,<sup>1,\*</sup> Weipeng Lai,<sup>1</sup> Tao Yu,<sup>1,2</sup> Ying Kang,<sup>1</sup> Zhongxue Ge<sup>1</sup>

<sup>1</sup> Xi'an Modern Chemistry Research Institute, Xi'an, 710065, P. R. China

<sup>2</sup> School of Materials Science and Engineering, Fuzhou University, Fuzhou, 350108, P. R. China

---

\* To whom correspondence should be addressed. E-mail: liuyz\_204@163.com.

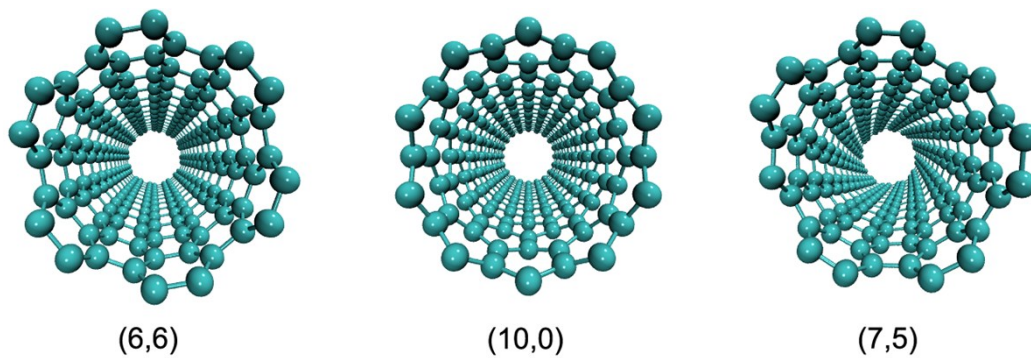

**Figure S1** The structures of three SWNTs with similar radii and lengths.

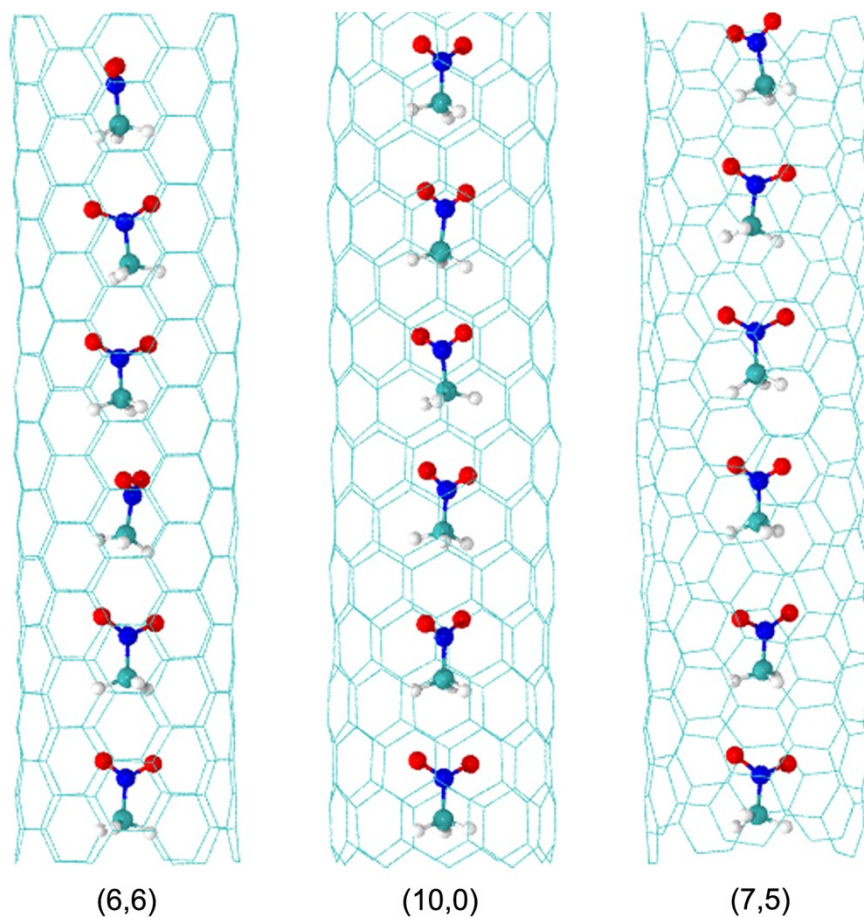

**Figure S2** The typical structures of NM adsorbed into the cavities of three SWNTs.

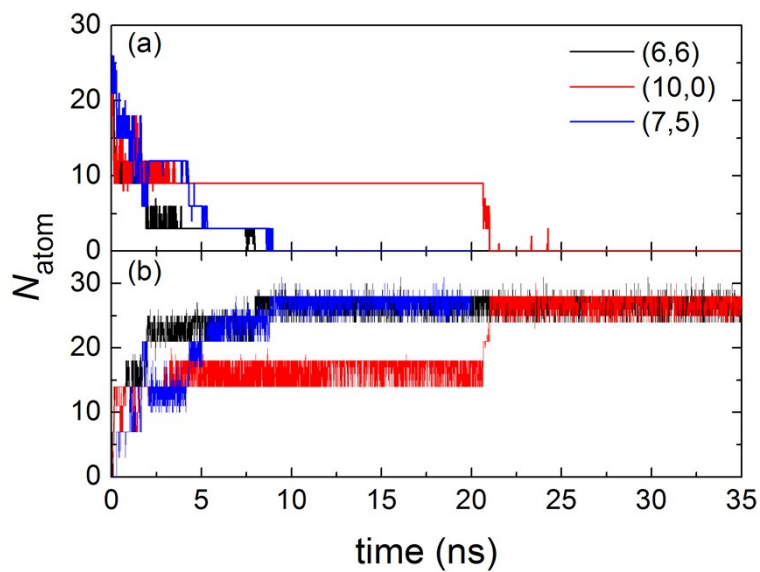

**Figure S3.** Number of (a) WT and (b) NM atoms inside three SWNTs as a function of simulation time.

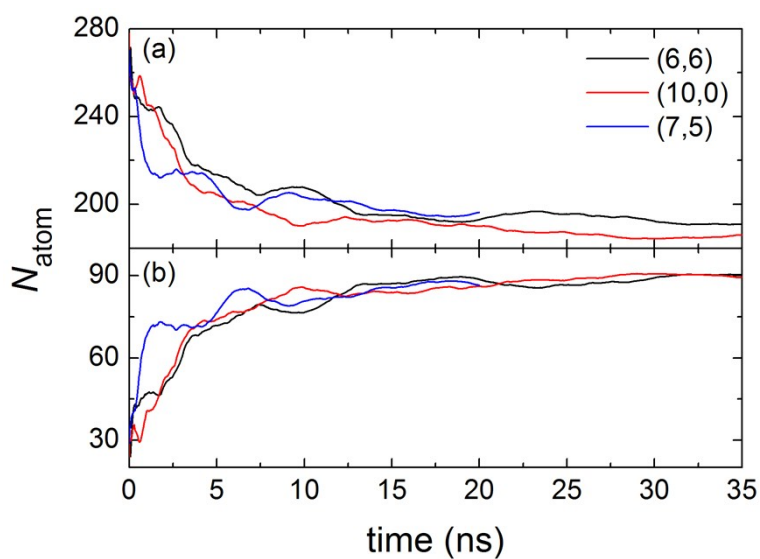

**Figure S4.** Moving average number of (a) WT and (b) NM atoms within 0.5 nm from the outer wall of three SWNTs as a function of simulation time.
